# Supplementary material
Source: Springer Nature journal article supplement (https://www.springermedizin.de/resource/supplementary/12891_2013_1972_MOESM3_ESM.pdf/9508920)

**a**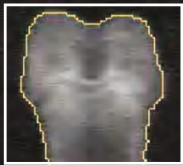**b**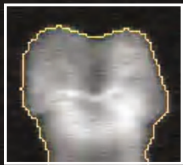**c**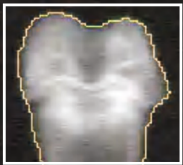

Supplement: MOESM3 [file 9508920]
